# Supplementary material for: Climate change and stream temperature projections in the Columbia River basin: habitat implications of spatial variation in hydrologic drivers
Source: Copernicus journal article supplement (doi:10.5194/hess-18-4897-2014), 2014-12-08
Supplement: Supplementary file 1 [file hess-18-4897-2014-supplement.zip]

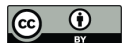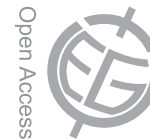

*Supplement of*

**Climate change and stream temperature projections in the Columbia River basin: habitat implications of spatial variation in hydrologic drivers**

**D. L. Ficklin et al.**

*Correspondence to:* D. L. Ficklin ([dficklin@indiana.edu](mailto:dficklin@indiana.edu))

- [hess-18-4897-2014-supplement-cover-letter.pdf](#)
- Supplemental Information
  - [Ficklin\\_HESS\\_parameters.csv](#)
